# Supplementary material for: Further In Vitro Assessment and Mid-Term Evaluation of Control Strategy of Xylella fastidiosa subsp. pauca in Olive Groves of Salento (Apulia, Italy)
Source: MDPI journal article supplement (doi:10.3390/pathogens10010085), 2021-01-19
Supplement: s1 [file s1]

Supplementary data.

**Figure S1.** *X. fastidiosa* subsp. *pauca* strain De Donno (CFBP8402), grown in addition with 1:10, 1:50 and 1:100 Dentamet® dilutions and without Dentamet® (control). Planktonic growth was assessed by real-time PCR on bacterial suspension.  $-\Delta Ct$  represents the difference between the Ct value obtained at each time point (respectively 6, 15, 30 dpi) and the Ct value at time 0 for each sample. Values are means  $\pm$  SD of the most representative experiment of two independent experiments (n=8 in total). No amplification (N.A.) was observed in 1:10 and 1:50 Dentamet®. A statistically significant difference was obtained between controls Xfp, (grown in PD2 broth) and the same strain added with Dentamet® 1:100 dilution, according to one-way ANOVA, Dunnett's test (\*\*\*p $\leq$  0.0001 vs Ctr).

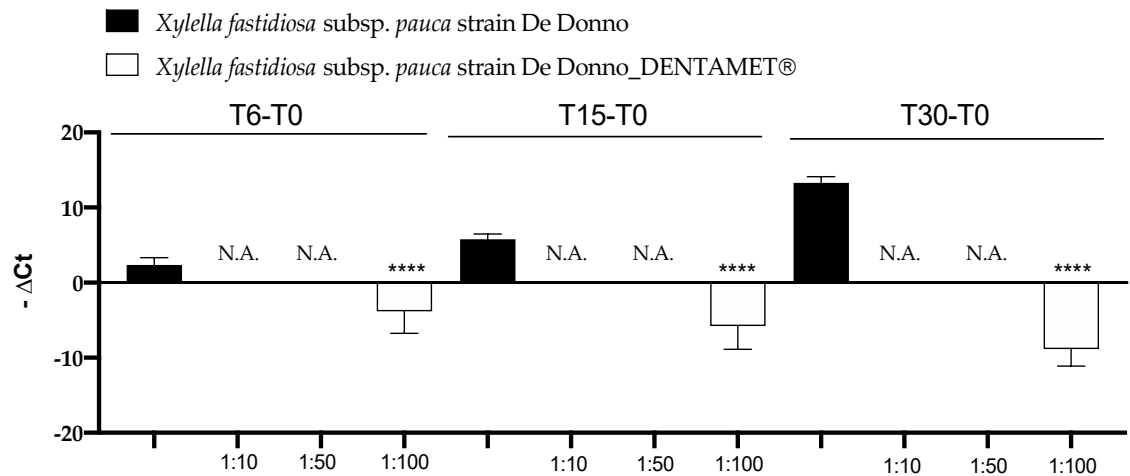

**Figure S2. Xfp Biofilm state growth.** *X. fastidiosa* biofilm state, in control tubes, is represented as a ring on tube walls (Crystal violet assay). No biofilm growth was observed for all the Dentamet® dilutions. This figure is representative for all *X. fastidiosa* subspecies.

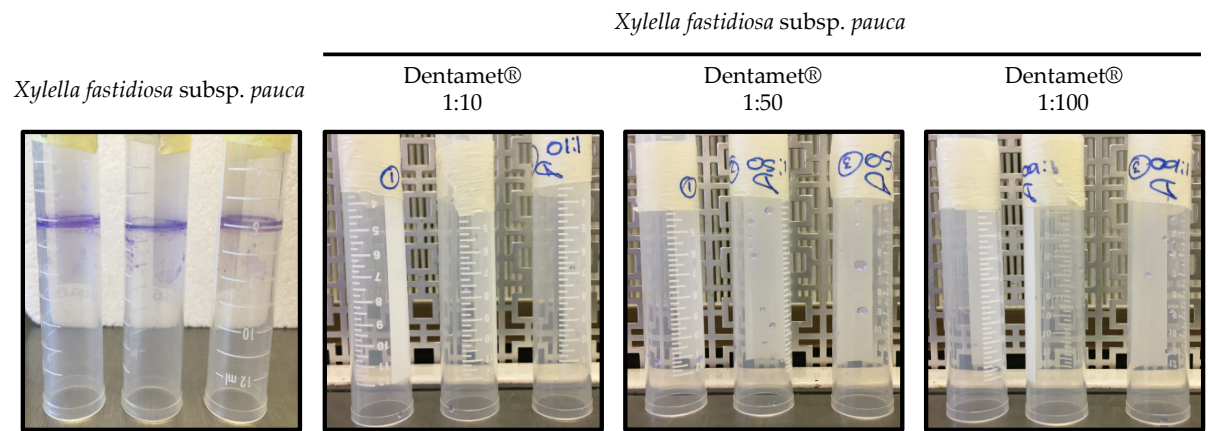

**Table S1.** The table reports the Ct value, *X. fastidiosa* gDNA ng  $\mu\text{L}^{-1}$  concentration, total *X. fastidiosa* gDNA amount, total *X. fastidiosa* gDNA amount per g sample, *X. fastidiosa* CFU equivalents per g sample and *X. fastidiosa* CFU equivalents per g plant sample. Each real time PCR run reports own standard curve parameters of efficiency (E),  $r^2$  and slope. The data are reported considering March samplings (cultivars and plots are shown).

| Cultivar       | Plot    | CT ratio | ng $\mu\text{L}^{-1}$ | ng TOT  | ng Tot g $^{-1}$ sample | CFU g $^{-1}$ | CFU value g $^{-1}$ plant |
|----------------|---------|----------|-----------------------|---------|-------------------------|---------------|---------------------------|
| OGLIAROLA 1 B  | CANNOLE | 28.83    | 0.01083               | 0.75831 | 0.94789                 | 4.75E+03      | 2.38E+03                  |
| OGLIAROLA 1 M  | CANNOLE | 37.27    | 0.00004               | 0.00296 | 0.00371                 | 1.86E+01      |                           |
| OGLIAROLA 2 B  | CANNOLE | 32.35    | 0.00150               | 0.10475 | 0.13094                 | 6.56E+02      | 5.68E+03                  |
| OGLIAROLA 2 M  | CANNOLE | 27.65    | 0.02441               | 1.70    | 2.13                    | 1.07E+04      |                           |
| OGLIAROLA 3 B  | CANNOLE | 36.30    | 0.00008               | 0.00560 | 0.00699                 | 3.51E+01      | 4.92E+01                  |
| OGLIAROLA 3 M  | CANNOLE | 35.93    | 0.00014               | 0.01012 | 0.01265                 | 6.34E+01      |                           |
| OGLIAROLA 4 B  | CANNOLE | 33.19    | 0.00062               | 0.04357 | 0.0547                  | 2.73E+02      | 1.63E+02                  |
| OGLIAROLA 4 M  | CANNOLE | 35.65    | 0.00012               | 0.00857 | 0.01071                 | 5.37E+01      |                           |
| OGLIAROLA 5 B  | CANNOLE | 35.39    | 0.00014               | 0.01013 | 0.01266                 | 6.35E+01      | 1.92E+03                  |
| OGLIAROLA 5 M  | CANNOLE | 29.17    | 0.00861               | 0.60257 | 0.75321                 | 3.77E+03      |                           |
| OGLIAROLA 6 B  | CANNOLE | 36.48    | 0.00009               | 0.00611 | 0.00764                 | 3.83E+01      | 6.24E+01                  |
| OGLIAROLA 6 M  | CANNOLE | 34.97    | 0.00020               | 0.01379 | 0.01724                 | 8.64E+01      |                           |
| OGLIAROLA 7 B  | CANNOLE | 37.46    | 0.00004               | 0.00262 | 0.00328                 | 1.64E+01      | 8.22E+00                  |
| OGLIAROLA 7 M  | CANNOLE | 0.00     | 0.00                  | 0.00    | 0.00                    | 0.00E+00      |                           |
| OGLIAROLA 8 B  | CANNOLE | 36.73    | 0.00006               | 0.00440 | 0.00550                 | 2.76E+01      | 4.36E+03                  |
| OGLIAROLA 8 M  | CANNOLE | 27.97    | 0.01982               | 1.38    | 1.73                    | 8.69E+03      |                           |
| OGLIAROLA 9 B  | CANNOLE | 27.04    | 0.03473               | 2.43    | 3.03                    | 1.52E+04      | 9.96E+03                  |
| OGLIAROLA 9 M  | CANNOLE | 28.84    | 0.01071               | 0.74939 | 0.93674                 | 4.60E+03      |                           |
| OGLIAROLA 10 B | CANNOLE | 26.94    | 0.03699               | 2.58    | 3.23                    | 1.62E+04      | 8.19E+03                  |
| OGLIAROLA 10 M | CANNOLE | 33.97    | 0.00037               | 0.02621 | 0.03276                 | 1.62E+02      |                           |
| CELLINA 1 B    | CANNOLE | 28.64    | 0.01236               | 0.86494 | 1.08                    | 5.42E+03      | 4.00E+03                  |
| CELLINA 1 M    | CANNOLE | 30.02    | 0.00587               | 0.41103 | 0.51379                 | 2.58E+03      |                           |
| CELLINA 2 B    | CANNOLE | 28.53    | 0.01332               | 0.93207 | 1.16                    | 5.84E+03      | 1.04E+04                  |
| CELLINA 2 M    | CANNOLE | 27.07    | 0.03413               | 2.38    | 2.98                    | 1.50E+04      |                           |
| CELLINA 3 B    | CANNOLE | 0.00     | 0.00                  | 0.00    | 0.00                    | 0.00E+00      | 3.14E+03 <sup>*1</sup>    |
| CELLINA 10 M   | CANNOLE | 26.56    | 0.04760               | 3.32    | 4.16                    | 2.09E+04      | 1.30E+04 <sup>*2</sup>    |

E=92.6%;  $r^2$ = 0.980; Slope=-3.515

<sup>\*1</sup> Mean with Cellina di Nardò 3M Cannole

<sup>\*2</sup> Mean with Cellina di Nardò 10B Cannole

| Cultivar     | Plot    | CT ratio | ng $\mu\text{L}^{-1}$ | ng TOT  | ng Tot $\text{g}^{-1}$ sample | CFU $\text{g}^{-1}$ | CFU value $\text{g}^{-1}$ plant |
|--------------|---------|----------|-----------------------|---------|-------------------------------|---------------------|---------------------------------|
| CELLINA 3 M  | CANNOLE | 26.78    | 0.01430               | 1.00    | 1.25                          | 6.27E+03            | 3.14E+03 <sup>*1</sup>          |
| CELLINA 4 B  | CANNOLE | 28.80    | 0.00389               | 0.27207 | 0.34009                       | 1.70E+03            |                                 |
| CELLINA 4 M  | CANNOLE | 27.14    | 0.01133               | 0.79307 | 0.99134                       | 4.97E+03            |                                 |
| CELLINA 5 B  | CANNOLE | 36.18    | 0.00003               | 0.00217 | 0.00272                       | 1.36E+01            | 1.20E+01                        |
| CELLINA 5 M  | CANNOLE | 36.68    | 0.00002               | 0.00166 | 0.00207                       | 1.04E+01            |                                 |
| CELLINA 6 B  | CANNOLE | 36.09    | 0.00003               | 0.00230 | 0.00288                       | 1.44E+01            | 1.88E+01                        |
| CELLINA 6 M  | CANNOLE | 35.37    | 0.00005               | 0.00369 | 0.00461                       | 2.31E+01            |                                 |
| CELLINA7 B   | CANNOLE | 0.00     | 0.00                  | 0.00    | 0.00                          | 0.00E+00            | 0.00E+00                        |
| CELLINA 7 M  | CANNOLE | 0.00     | 0.00                  | 0.00    | 0.00                          | 0.00E+00            |                                 |
| CELLINA 8 B  | CANNOLE | 35.39    | 0.00005               | 0.00365 | 0.00456                       | 2.29E+01            | 1.70E+01                        |
| CELLINA 8 M  | CANNOLE | 36.61    | 0.00003               | 0.00177 | 0.00221                       | 1.11E+00            |                                 |
| CELLINA 9 B  | CANNOLE | 36.13    | 0.00004               | 0.00267 | 0.00333                       | 1.67E+01            | 1.52E+01                        |
| CELLINA 9 M  | CANNOLE | 36.18    | 0.00003               | 0.00219 | 0.00273                       | 1.37E+01            |                                 |
| CELLINA 10 B | CANNOLE | 27.11    | 0.01155               | 0.80879 | 1.01                          | 5.07E+03            | 1.30E+04 <sup>*2</sup>          |

E=92%;  $r^2 = 0.996$ ; Slope=-3.529

<sup>\*1</sup> Mean with Cellina di Nardò 3B Cannole

<sup>\*2</sup> Mean with Cellina di Nardò 10M Cannole

| Cultivar    | Plot     | CT ratio | ng $\mu\text{L}^{-1}$ | ng TOT  | ng Tot $\text{g}^{-1}$ sample | CFU $\text{g}^{-1}$ | CFU value $\text{g}^{-1}$ plant |
|-------------|----------|----------|-----------------------|---------|-------------------------------|---------------------|---------------------------------|
| LECCINO 1 B | GALATONE | 31.42    | 0.00079               | 0.05510 | 0.06887                       | 3.45E+02            | 3.22E+03                        |
| LECCINO 1 M | GALATONE | 27.07    | 0.01391               | 0.97352 | 1.21                          | 6.10E+03            |                                 |
| LECCINO 2 B | GALATONE | 30.00    | 0.00200               | 0.14011 | 0.17513                       | 8.78E+02            | 3.62E+03                        |
| LECCINO 2 M | GALATONE | 27.01    | 0.01451               | 1.01    | 1.26                          | 6.36E+03            |                                 |
| LECCINO 3 B | GALATONE | 35.10    | 0.00008               | 0.00535 | 0.00668                       | 3.35E+01            | 2.37E+03                        |
| LECCINO 3 M | GALATONE | 27.47    | 0.01072               | 0.75040 | 0.75                          | 4.70E+03            |                                 |
| LECCINO 4 B | GALATONE | 30.52    | 0.00142               | 0.09916 | 0.12395                       | 6.21E+02            | 3.27E+02                        |
| LECCINO 4 M | GALATONE | 34.99    | 0.00007               | 0.00522 | 0.00653                       | 3.27E+01            |                                 |
| LECCINO 5 B | GALATONE | 34.34    | 0.00013               | 0.00907 | 0.01133                       | 5.68E+01            | 3.25E+01                        |
| LECCINO 5 M | GALATONE | 37.06    | 0.00002               | 0.00131 | 0.00164                       | 8.23E+00            |                                 |
| LECCINO 6 B | GALATONE | 26.39    | 0.02189               | 1.53    | 1.91                          | 9.60E+03            | 5.35E+03                        |
| LECCINO 6 M | GALATONE | 29.67    | 0.00250               | 0.17500 | 0.21875                       | 1.10E+03            |                                 |
| LECCINO 7 B | GALATONE | 35.29    | 0.00007               | 0.00490 | 0.00613                       | 3.07E+01            | 5.28E+02                        |
| LECCINO7 M  | GALATONE | 29.77    | 0.00234               | 0.16380 | 0.20475                       | 1.03E+01            |                                 |
| CELLINA 1 B | GALATONE | 26.25    | 0.02398               | 16.68   | 20.98                         | 1.05E+04            | 2.46E+04                        |
| CELLINA 1 M | GALATONE | 24.28    | 0.08819               | 6.17    | 7.71                          | 3.87E+04            |                                 |
| CELLINA 2 B | GALATONE | 37.02    | 0.00002               | 0.00144 | 0.00180                       | 9.03E+00            | 2.05E+04                        |
| CELLINA 2 M | GALATONE | 24.19    | 0.09365               | 6.55    | 8.19                          | 4.11E+04            |                                 |
| CELLINA 3 B | GALATONE | 22.22    | 0.34644               | 24.25   | 30.31                         | 1.52E+05            | 1.11E+05                        |
| CELLINA 3 M | GALATONE | 23.38    | 0.16100               | 11.26   | 14.08                         | 7.06E+04            |                                 |

E=93.8%;  $r^2 = 0.996$ ; Slope=-3.379

| Cultivar      | Plot     | CT ratio | ng $\mu\text{L}^{-1}$ | ng TOT  | ng Tot $\text{g}^{-1}$ sample | CFU $\text{g}^{-1}$ | CFU value $\text{g}^{-1}$ plant |
|---------------|----------|----------|-----------------------|---------|-------------------------------|---------------------|---------------------------------|
| CELLINA 4 B   | GALATONE | 26.5     | 0.02343               | 1.64    | 2.05                          | 1.03E+04            | 3.92E+04                        |
| CELLINA 4 M   | GALATONE | 23.61    | 0.15530               | 10.87   | 13.58                         | 6.81E+04            |                                 |
| CELLINA 5 B   | GALATONE | 25.34    | 0.05028               | 3.51    | 4.39                          | 2.21E+04            | 7.18E+04                        |
| CELLINA 5 M   | GALATONE | 22.73    | 0.27696               | 19.38   | 24.23                         | 1.21E+05            |                                 |
| CELLINA 6 B   | GALATONE | 25.22    | 0.05410               | 3.78    | 4.73                          | 2.37E+04            | 2.21E+04                        |
| CELLINA 6 M   | GALATONE | 25.45    | 0.04649               | 3.25    | 4.06                          | 2.04E+04            |                                 |
| CELLINA7 B    | GALATONE | 25.35    | 0.05101               | 3.57    | 4.46                          | 2.24E+04            | 2.57E+04                        |
| CELLINA 7 M   | GALATONE | 24.91    | 0.06625               | 4.63    | 5.79                          | 2.91E+04            |                                 |
| OGLIAROLA 1 B | GALATONE | 25.76    | 0.03822               | 2.67    | 3.34                          | 1.67E+04            | 1.13E+04                        |
| OGLIAROLA 1 M | GALATONE | 27.34    | 0.01350               | 0.94487 | 1.18                          | 5.92E+03            |                                 |
| OGLIAROLA 2 B | GALATONE | 23.87    | 0.13088               | 9.16    | 11.45                         | 5.74E+04            | 3.99E+04                        |
| OGLIAROLA 2 M | GALATONE | 25.31    | 0.05116               | 3.58    | 4.47                          | 2.24E+04            |                                 |
| OGLIAROLA 3 B | GALATONE | 32.31    | 0.00056               | 0.03641 | 0.04551                       | 2.28E+02            | 1.28E+02                        |
| OGLIAROLA 3 M | GALATONE | 35.55    | 0.00006               | 0.00438 | 0.00545                       | 2.73E+01            |                                 |
| OGLIAROLA 4 B | GALATONE | 25.25    | 0.05311               | 3.71    | 4.64                          | 2.33E+04            | 2.60E+04                        |
| OGLIAROLA 4 M | GALATONE | 24.93    | 0.06530               | 4.57    | 5.71                          | 2.86E+04            |                                 |
| OGLIAROLA 5 B | GALATONE | 25.92    | 0.03416               | 2.39    | 2.98                          | 1.50E+04            | 1.40E+04                        |
| OGLIAROLA 5 M | GALATONE | 26.14    | 0.02959               | 2.07    | 2.58                          | 1.30E+04            |                                 |
| OGLIAROLA 6 B | GALATONE | 27.56    | 0.01167               | 0.81680 | 1.02                          | 5.12E+03            | 2.94E+03                        |
| OGLIAROLA 6 M | GALATONE | 30.45    | 0.00176               | 0.12301 | 0.15376                       | 7.71E+02            |                                 |
| OGLIAROLA 7 B | GALATONE | 26.97    | 0.01746               | 1.22    | 1.52                          | 7.66E+03            | 9.52E+03                        |
| OGLIAROLA 7 M | GALATONE | 26.34    | 0.02596               | 1.81    | 2.27                          | 1.14E+04            |                                 |

E=92.5%;  $r^2=0.992$ ; Slope=-3.515

**Table S2.** The table reports the Ct value, *X. fastidiosa* gDNA ng  $\mu\text{L}^{-1}$  concentration, total *X. fastidiosa* gDNA amount, total *X. fastidiosa* gDNA amount per g sample, *X. fastidiosa* CFU equivalents per g sample and *X. fastidiosa* CFU equivalents per g plant sample. Each real time PCR run reports own standard curve parameters of efficiency (E),  $r^2$  and slope. The data are reported considering July samplings (cultivars and plots are shown).

| Cultivar       | Plot    | CT ratio | ng $\mu\text{L}^{-1}$ | ng TOT  | ng Tot $\text{g}^{-1}$ sample | CFU $\text{g}^{-1}$ | CFU value $\text{g}^{-1}$ plant |
|----------------|---------|----------|-----------------------|---------|-------------------------------|---------------------|---------------------------------|
| CELLINA 1 B    | CANNOLE | 36.19    | 0.00002               | 0.00146 | 0.00182                       | 9.12E+00            | 4.56E+00                        |
| CELLINA 1 M    | CANNOLE | 0.00     | 0.00                  | 0.00    | 0.00                          | 0.00E+00            |                                 |
| CELLINA 2 B    | CANNOLE | 36.08    | 0.00002               | 0.00156 | 0.00196                       | 9.82E+00            | 4.91E+00                        |
| CELLINA 2 M    | CANNOLE | 0.00     | 0.00                  | 0.00    | 0.00                          | 0.00E+00            |                                 |
| CELLINA 3 B    | CANNOLE | 36.96    | 0.00001               | 0.00109 | 0.00127                       | 6.38E+00            | 6.25E+02                        |
| CELLINA 3 M    | CANNOLE | 28.99    | 0.00283               | 0.19839 | 0.24799                       | 1.24E+03            |                                 |
| CELLINA 4 B    | CANNOLE | 30.59    | 0.00095               | 0.06634 | 0.08293                       | 4.16E+02            | 2.08E+02                        |
| CELLINA 4 M    | CANNOLE | 0.00     | 0.00                  | 0.00    | 0.00                          | 0.00E+00            |                                 |
| CELLINA 5 B    | CANNOLE | 0.00     | 0.00                  | 0.00    | 0.00                          | 0.00E+00            | 4.72E+02                        |
| CELLINA 5 M    | CANNOLE | 29.38    | 0.00215               | 0.15074 | 0.18843                       | 9.44E+02            |                                 |
| CELLINA 6 B    | CANNOLE | 35.17    | 0.00004               | 0.00306 | 0.00383                       | 1.91E+01            | 9.60E+00                        |
| CELLINA 6 M    | CANNOLE | 0.00     | 0.00                  | 0.00    | 0.00                          | 0.00E+00            |                                 |
| CELLINA 7 B    | CANNOLE | 0.00     | 0.00                  | 0.00    | 0.00                          | 0.00E+00            | 1.61E+01                        |
| CELLINA 7 M    | CANNOLE | 34.47    | 0.00007               | 0.00512 | 0.00641                       | 3.21E+01            |                                 |
| CELLINA 8 B    | CANNOLE | 0.00     | 0.00                  | 0.00    | 0.00                          | 0.00E+00            | 0.00E+00                        |
| CELLINA 8 M    | CANNOLE | 0.00     | 0.00                  | 0.00    | 0.00                          | 0.00E+00            |                                 |
| CELLINA 9 B    | CANNOLE | 36.19    | 0.000002              | 0.00145 | 0.00182                       | 9.11E+00            | 1.02E+01                        |
| CELLINA 9 M    | CANNOLE | 35.87    | 0.00003               | 0.00180 | 0.00225                       | 1.13E+01            |                                 |
| CELLINA 10 B   | CANNOLE | 30.55    | 0.00097               | 0.06772 | 0.08466                       | 4.24E+02            | 3.79E+02                        |
| CELLINA 10 M   | CANNOLE | 30.26    | 0.00118               | 0.08240 | 0.10301                       | 5.16E+02            |                                 |
| OGLIAROLA 1 B  | CANNOLE | 0.00     | 0.00                  | 0.00    | 0.00                          | 0.00E+00            | 2.71E+00                        |
| OGLIAROLA 1 M  | CANNOLE | 36.95    | 0.00001               | 0.00086 | 0.00108                       | 5.42E+00            |                                 |
| OGLIAROLA 2 B  | CANNOLE | 32.71    | 0.00022               | 0.01555 | 0.01944                       | 9.75E+01            | 1.37E+02                        |
| OGLIAROLA 2 M  | CANNOLE | 31.87    | 0.00040               | 0.02833 | 0.03541                       | 1.78E+02            |                                 |
| OGLIAROLA 3 B  | CANNOLE | 0.00     | 0.00                  | 0.00    | 0.00                          | 0.00E+00            | 9.73E+02                        |
| OGLIAROLA 3 M  | CANNOLE | 28.32    | 0.00444               | 0.31061 | 0.38827                       | 1.95E+03            |                                 |
| OGLIAROLA 4 B  | CANNOLE | 29.75    | 0.00167               | 0.11686 | 0.14608                       | 7.32E+02            | 3.71E+02                        |
| OGLIAROLA 4 M  | CANNOLE | 36.02    | 0.00002               | 0.00162 | 0.00203                       | 1.24E+01            |                                 |
| OGLIAROLA 5 B  | CANNOLE | 30.90    | 0.00077               | 0.05381 | 0.06726                       | 3.37E+02            | 2.91E+02                        |
| OGLIAROLA 5 M  | CANNOLE | 31.39    | 0.00056               | 0.03899 | 0.04874                       | 2.44E+02            |                                 |
| OGLIAROLA 6 B  | CANNOLE | 0.00     | 0.00                  | 0.00    | 0.00                          | 0.00E+00            | 3.44E+02                        |
| OGLIAROLA 6 M  | CANNOLE | 29.84    | 0.00157               | 0.10978 | 0.13722                       | 6.88E+02            |                                 |
| OGLIAROLA 7 B  | CANNOLE | 36.01    | 0.00002               | 0.00164 | 0.00205                       | 1.03E+01            | 2.28E+01 * <sup>1</sup>         |
| OGLIAROLA 8 B  | CANNOLE | 29.77    | 0.00170               | 0.11888 | 0.14860                       | 7.45E+02            | 1.03E+03 * <sup>2</sup>         |
| OGLIAROLA 9 B  | CANNOLE | 28.81    | 0.00322               | 0.2256  | 0.28201                       | 1.41E+03            | 1.44E+03 * <sup>3</sup>         |
| OGLIAROLA 10 B | CANNOLE | 0.00     | 0.00                  | 0.00    | 0.00                          | 0.00E+00            | 5.61E+00 * <sup>4</sup>         |

E=97.7%;  $r^2$ =0.986; Slope=-3.379

\*<sup>1</sup> Mean with Ogliarola salentina 7M Cannole

\*<sup>2</sup> Mean with Ogliarola salentina 8M Cannole

\*<sup>3</sup> Mean with Ogliarola salentina 9M Cannole

\*<sup>4</sup> Mean with Ogliarola salentina 10M Cannole

| Cultivar       | Plot     | CT ratio | ng $\mu\text{L}^{-1}$ | ng TOT  | ng Tot $\text{g}^{-1}$ sample | CFU $\text{g}^{-1}$ | CFU value $\text{g}^{-1}$ plant |
|----------------|----------|----------|-----------------------|---------|-------------------------------|---------------------|---------------------------------|
| OGLIAROLA 7 M  | CANNOLE  | 34.38    | 0.00008               | 0.00565 | 0.00706                       | 3.54E+01            | 2.28E+01 * <sup>1</sup>         |
| OGLIAROLA 8 M  | CANNOLE  | 28.91    | 0.00299               | 0.20932 | 0.26165                       | 1.31E+03            | 1.03E+03 * <sup>2</sup>         |
| OGLIAROLA 9 M  | CANNOLE  | 28.74    | 0.00336               | 0.23485 | 0.29356                       | 1.47E+03            | 1.44E+03 * <sup>3</sup>         |
| OGLIAROLA 10 M | CANNOLE  | 36.10    | 0.00003               | 0.00179 | 0.00223                       | 1.12E+01            | 5.61E+00 * <sup>4</sup>         |
| CELLINA 1 B    | GALATONE | 30.58    | 0.00099               | 0.06924 | 0.08655                       | 4.34E+02            | 6.38E+02                        |
| CELLINA 1 M    | GALATONE | 29.59    | 0.00192               | 0.13427 | 0.16784                       | 8.41E+02            |                                 |
| CELLINA 2 B    | GALATONE | 32.65    | 0.00027               | 0.01855 | 0.02319                       | 1.16E+02            | 3.57E+02                        |
| CELLINA 2 M    | GALATONE | 30.10    | 0.00136               | 0.9541  | 0.11927                       | 5.98E+02            |                                 |
| CELLINA 3 B    | GALATONE | 27.02    | 0.01047               | 0.73308 | 0.91635                       | 4.59E+03            | 2.71E+03                        |
| CELLINA 3 M    | GALATONE | 29.61    | 0.00188               | 0.13135 | 0.16419                       | 8.23E+02            |                                 |
| CELLINA 4 B    | GALATONE | 26.08    | 0.01952               | 1.36    | 1.70                          | 8.56E+03            | 4.84E+03                        |
| CELLINA 4 M    | GALATONE | 29.15    | 0.00256               | 0.17948 | 0.22435                       | 1.12E+03            |                                 |
| CELLINA 5 B    | GALATONE | 26.85    | 0.01178               | 0.82438 | 1.03                          | 5.16E+03            | 7.96E+03                        |
| CELLINA 5 M    | GALATONE | 25.73    | 0.02451               | 1.71    | 2.14                          | 1.07E+04            |                                 |
| CELLINA 6 B    | GALATONE | 28.93    | 0.00296               | 0.20712 | 0.25890                       | 1.30E+03            | 1.37E+03                        |
| CELLINA 6 M    | GALATONE | 28.76    | 0.00331               | 0.23143 | 0.28929                       | 1.45E+03            |                                 |
| CELLINA 7 B    | GALATONE | 27.72    | 0.00658               | 0.46072 | 0.57590                       | 2.89E+03            | 3.17E+03                        |
| CELLINA 7 M    | GALATONE | 27.44    | 0.00789               | 0.69014 | 0.69014                       | 3.46E+03            |                                 |
| LECCINO 1 B    | GALATONE | 0.00     | 0.00                  | 0.00    | 0.00                          | 0.00E+00            | 0.00E+00                        |
| LECCINO 1 M    | GALATONE | 0.00     | 0.00                  | 0.00    | 0.00                          | 0.00E+00            |                                 |
| LECCINO 2 B    | GALATONE | 30.14    | 0.00133               | 0.09293 | 0.11616                       | 5.82E+02            | 2.91E+02                        |
| LECCINO 2 M    | GALATONE | 0.00     | 0.00                  | 0.00    | 0.00                          | 0.00E+00            |                                 |
| LECCINO 3 B    | GALATONE | 0.00     | 0.00                  | 0.00    | 0.00                          | 0.00E+00            | 0.00E+00                        |
| LECCINO 3 M    | GALATONE | 0.00     | 0.00                  | 0.00    | 0.00                          | 0.00E+00            |                                 |
| LECCINO 4 B    | GALATONE | 0.00     | 0.00                  | 0.00    | 0.00                          | 0.00E+00            | 2.26E+02                        |
| LECCINO 4 M    | GALATONE | 30.55    | 0.07208               | 0.09010 | 0.65475                       | 4.52E+02            |                                 |
| LECCINO 5 B    | GALATONE | 27.44    | 0.00789               | 0.55220 | 0.69025                       | 3.46E+03            | 1.73E+03                        |
| LECCINO 5 M    | GALATONE | 0.00     | 0.00                  | 0.00    | 0.00                          | 0.00E+00            |                                 |
| LECCINO 6 B    | GALATONE | 0.00     | 0.00                  | 0.00    | 0.00                          | 0.00E+00            | 0.00E+00                        |
| LECCINO 6 M    | GALATONE | 0.00     | 0.00                  | 0.00    | 0.00                          | 0.00E+00            |                                 |
| LECCINO 7 B    | GALATONE | 0.00     | 0.00                  | 0.00    | 0.00                          | 0.00E+00            | 0.00E+00                        |
| LECCINO 7 M    | GALATONE | 0.00     | 0.00                  | 0.00    | 0.00                          | 0.00E+00            |                                 |
| OGLIAROLA 1 B  | GALATONE | 0.00     | 0.00                  | 0.00    | 0.00                          | 0.00E+00            | 8.54E+01 * <sup>5</sup>         |
| OGLIAROLA 2 B  | GALATONE | 29.59    | 0.00190               | 0.13316 | 0.16645                       | 8.34E+02            | 3.84E+03 * <sup>6</sup>         |
| OGLIAROLA 3 B  | GALATONE | 36.65    | 0.00002               | 0.00124 | 0.00155                       | 0.34E+02            | 3.89E+00 * <sup>7</sup>         |
| OGLIAROLA 4 B  | GALATONE | 27.82    | 0.00616               | 0.43149 | 0.53937                       | 2.70E+03            | 1.40E+03 * <sup>8</sup>         |

E=93.9%;  $r^2=0.981$ ; Slope=-3.478

\*<sup>1</sup> Mean with Oglierola salentina 7B Cannole

\*<sup>2</sup> Mean with Oglierola salentina 8B Cannole

\*<sup>3</sup> Mean with Oglierola salentina 9B Cannole

\*<sup>4</sup> Mean with Oglierola salentina 10B Cannole

\*<sup>5</sup> Mean with Oglierola salentina 1M Galatone

\*<sup>6</sup> Mean with Oglierola salentina 2M Galatone

\*<sup>7</sup> Mean with Oglierola salentina 3M Galatone

\*<sup>8</sup> Mean with Oglierola salentina 4M Galatone

| Cultivar      | Plot     | CT ratio | ng $\mu\text{L}^{-1}$ | ng TOT  | ng Tot $\text{g}^{-1}$ sample | CFU $\text{g}^{-1}$ | CFU value $\text{g}^{-1}$ plant |
|---------------|----------|----------|-----------------------|---------|-------------------------------|---------------------|---------------------------------|
| OGLIAROLA 1 M | GALATONE | 32.30    | 0.00039               | 0.02    | 0.02726                       | 1.71E+02            | 8.54E+01 * <sup>5</sup>         |
| OGLIAROLA 2 M | GALATONE | 26.56    | 0.01563               | 1.09    | 1.36                          | 6.85E+03            | 3.84E+03 * <sup>6</sup>         |
| OGLIAROLA 3 M | GALATONE | 0.00     | 0.00                  | 0.00    | 0.00                          | 0.00E+00            | 3.89E+00 * <sup>7</sup>         |
| OGLIAROLA 4 M | GALATONE | 33.17    | 0.00022               | 0.01537 | 0.01921                       | 8.63E+01            | 1.40E+03 * <sup>8</sup>         |
| OGLIAROLA 5 B | GALATONE | 26.79    | 0.01354               | 0.94812 | 1.18                          | 5.94E+03            | 5.04E+03                        |
| OGLIAROLA 5 M | GALATONE | 27.35    | 0.00945               | 0.66129 | 0.82662                       | 4.14E+03            |                                 |
| OGLIAROLA 6 B | GALATONE | 30.99    | 0.00091               | 0.06353 | 0.07942                       | 3.98E+02            | 2.35E+03                        |
| OGLIAROLA 6 M | GALATONE | 27.28    | 0.00981               | 0.68700 | 0.85875                       | 4.30E+03            |                                 |
| OGLIAROLA 7 B | GALATONE | 28.06    | 0.00596               | 0.41731 | 0.52164                       | 2.61E+03            | 2.91E+03                        |
| OGLIAROLA 7 M | GALATONE | 27.75    | 0.00730               | 0.51130 | 0.639913                      | 3.20E+03            |                                 |

E=90.9%;  $r^2=0.991$ ; Slope=-3.562

\*<sup>5</sup> Mean with Ogliarola salentina 1B Galatone

\*<sup>6</sup> Mean with Ogliarola salentina 2B Galatone

\*<sup>7</sup> Mean with Ogliarola salentina 3B Galatone

\*<sup>8</sup> Mean with Ogliarola salentina 4B Galatone

**Table S3.** The table reports the Ct value, *X. fastidiosa* gDNA ng  $\mu\text{L}^{-1}$  concentration, total *X. fastidiosa* gDNA amount, total *X. fastidiosa* gDNA amount per g sample, *X. fastidiosa* CFU equivalents per g sample and *X. fastidiosa* CFU equivalents per g plant sample. Each real time PCR run reports own standard curve parameters of efficiency (E),  $r^2$  and slope. The data are reported considering October samplings (cultivars and plots are shown).

| Cultivar       | Plot    | CT ratio | ng $\mu\text{L}^{-1}$ | ng TOT  | ng Tot $\text{g}^{-1}$ sample | CFU $\text{g}^{-1}$ | CFU value $\text{g}^{-1}$ plant |
|----------------|---------|----------|-----------------------|---------|-------------------------------|---------------------|---------------------------------|
| CELLINA 1 B    | CANNOLE | 33.64    | 0.00003               | 0.00203 | 0.00254                       | 1.27E+01            | 3.98E+02                        |
| CELLINA 1 M    | CANNOLE | 26.40    | 0.00346               | 0.24209 | 0.30261                       | 1.52E+03            |                                 |
| CELLINA 2 B    | CANNOLE | 27.38    | 0.00178               | 0.12491 | 0.15614                       | 7.83E+02            | 7.61E+02                        |
| CELLINA 2 M    | CANNOLE | 23.65    | 0.02186               | 1.53    | 1.91                          | 9.59E+03            |                                 |
| CELLINA 3 B    | CANNOLE | 29.71    | 0.00038               | 0.02690 | 0.03362                       | 1.69E+02            | 2.78E+02                        |
| CELLINA 3 M    | CANNOLE | 26.01    | 0.00446               | 0.31222 | 0.39027                       | 1.96E+03            |                                 |
| CELLINA 4 B    | CANNOLE | 26.56    | 0.00308               | 0.21591 | 0.26989                       | 1.35E+03            | 4.64E+02                        |
| CELLINA 4 M    | CANNOLE | 25.74    | 0.00542               | 0.37905 | 0.47382                       | 2.37E+03            |                                 |
| CELLINA 5 B    | CANNOLE | 29.02    | 0.00060               | 0.04220 | 0.05275                       | 2.64E+02            | 7.56E+02                        |
| CELLINA 5 M    | CANNOLE | 25.43    | 0.00681               | 0.47642 | 0.59553                       | 2.98E+03            |                                 |
| CELLINA 6 B    | CANNOLE | 28.87    | 0.00066               | 0.04652 | 0.05816                       | 2.91E+02            | 5.56E+03                        |
| CELLINA 6 M    | CANNOLE | 25.64    | 0.00542               | 0.39676 | 0.49595                       | 2.49E+03            |                                 |
| CELLINA 7 B    | CANNOLE | 27.51    | 0.00164               | 0.11484 | 0.14355                       | 7.19E+02            | 2.17E+03                        |
| CELLINA 7 M    | CANNOLE | 23.88    | 0.01838               | 1.28    | 1.61                          | 8.06E+03            |                                 |
| CELLINA 8 B    | CANNOLE | 29.41    | 0.00047               | 0.03325 | 0.041156                      | 2.08E+02            | 1.49E+03                        |
| CELLINA 8 M    | CANNOLE | 0.00     | 0.00                  | 0.00    | 0.00                          | 0.00E+00            |                                 |
| CELLINA 9 B    | CANNOLE | 0.00     | 0.00                  | 0.00    | 0.00                          | 0.00E+00            | 0.00E+00                        |
| CELLINA 9 M    | CANNOLE | 0.00     | 0.00                  | 0.00    | 0.00                          | 0.00E+00            |                                 |
| CELLINA 10 B   | CANNOLE | 26.39    | 0.00345               | 0.24129 | 0.30161                       | 1.51E+03            | 1.37E+02                        |
| CELLINA 10 M   | CANNOLE | 28.97    | 0.00062               | 0.04364 | 0.05455                       | 2.73E+02            |                                 |
| OGLIAROLA 1 B  | CANNOLE | 31.85    | 0.00010               | 0.00700 | 0.00875                       | 4.38E+01            | 8.08E+02                        |
| OGLIAROLA 1 M  | CANNOLE | 26.45    | 0.00359               | 0.25101 | 0.31376                       | 1.57E+03            |                                 |
| OGLIAROLA 2 B  | CANNOLE | 26.60    | 0.00302               | 0.21144 | 0.26430                       | 1.32E+03            | 1.09E+04                        |
| OGLIAROLA 2 M  | CANNOLE | 22.47    | 0.04656               | 3.25    | 4.07                          | 2.04E+04            |                                 |
| OGLIAROLA 3 B  | CANNOLE | 28.31    | 0.00098               | 0.06855 | 0.08569                       | 4.29E+02            | 6.17E+02                        |
| OGLIAROLA 3 M  | CANNOLE | 27.34    | 0.00183               | 0.12832 | 0.16040                       | 8.04E+02            |                                 |
| OGLIAROLA 4 B  | CANNOLE | 26.09    | 0.0445                | 0.31150 | 0.38938                       | 1.95E+03            | 1.18E+03                        |
| OGLIAROLA 4 M  | CANNOLE | 28.48    | 0.00092               | 0.06444 | 0.08055                       | 4.04E+02            |                                 |
| OGLIAROLA 5 B  | CANNOLE | 30.43    | 0.00026               | 0.01799 | 0.02249                       | 1.13E+02            | 9.14E+02                        |
| OGLIAROLA 5 M  | CANNOLE | 26.20    | 0.00391               | 0.27390 | 0.34238                       | 1.72E+03            |                                 |
| OGLIAROLA 6 B  | CANNOLE | 29.22    | 0.00054               | 0.03754 | 0.04692                       | 2.35E+02            | 2.13E+02 * <sup>1</sup>         |
| OGLIAROLA 7 B  | CANNOLE | 29.11    | 0.00057               | 0.03999 | 0.04999                       | 2.51E+02            | 7.92E+02 * <sup>2</sup>         |
| OGLIAROLA 8 B  | CANNOLE | 26.23    | 0.00384               | 0.26882 | 0.33602                       | 1.68E+03            | 3.04E+03 * <sup>3</sup>         |
| OGLIAROLA 9 B  | CANNOLE | 27.98    | 0.00122               | 0.08535 | 0.10668                       | 5.35E+02            | 7.36E+02 * <sup>4</sup>         |
| OGLIAROLA 10 B | CANNOLE | 26.16    | 0.00401               | 0.28087 | 0.35109                       | 1.76E+03            | 8.88E+02* <sup>5</sup>          |

E=94.2%;  $r^2$ =0.996; Slope=-3.471

\*<sup>1</sup> Mean with Ogliarola salentina 6M Cannole

\*<sup>2</sup> Mean with Ogliarola salentina 7M Cannole

\*<sup>3</sup> Mean with Ogliarola salentina 8M Cannole

\*<sup>4</sup> Mean with Ogliarola salentina 9M Cannole

\*<sup>5</sup> Mean with Ogliarola salentina 10M Cannole



| Cultivar       | Plot     | CT ratio | ng $\mu\text{L}^{-1}$ | ng TOT  | ng Tot $\text{g}^{-1}$ sample | CFU $\text{g}^{-1}$ | CFU value $\text{g}^{-1}$ plant |
|----------------|----------|----------|-----------------------|---------|-------------------------------|---------------------|---------------------------------|
| OGLIAROLA 6 M  | CANNOLE  | 31.45    | 0.00044               | 0.03050 | 0.03813                       | 1.91E+02            | 2.13E+02 * <sup>1</sup>         |
| OGLIAROLA 7 M  | CANNOLE  | 28.30    | 0.00304               | 0.21284 | 0.26605                       | 1.33E+03            | 7.92E+02 * <sup>2</sup>         |
| OGLIAROLA 8 M  | CANNOLE  | 26.37    | 0.01001               | 0.70077 | 0.87596                       | 4.39E+03            | 3.04E+03 * <sup>3</sup>         |
| OGLIAROLA 9 M  | CANNOLE  | 28.88    | 0.00214               | 0.14946 | 0.18683                       | 9.36E+02            | 7.36E+02 * <sup>4</sup>         |
| OGLIAROLA 10 M | CANNOLE  | 35.46    | 0.00004               | 0.00259 | 0.00323                       | 1.62E+01            | 8.88E+02 * <sup>5</sup>         |
| CELLINA 1 B    | GALATONE | 26.34    | 0.01020               | 0.71383 | 0.89229                       | 4.47E+03            | 5.66E+03                        |
| CELLINA 1 M    | GALATONE | 25.66    | 0.01561               | 1.09    | 1.36                          | 6.84E+03            |                                 |
| CELLINA 2 B    | GALATONE | 25.17    | 0.02092               | 1.46    | 1.83                          | 9.18E+03            | 9.68E+03                        |
| CELLINA 2 M    | GALATONE | 25.00    | 0.02320               | 1.62    | 2.03                          | 1.02E+04            |                                 |
| CELLINA 3 B    | GALATONE | 29.45    | 0.00151               | 0.10551 | 0.13188                       | 6.61E+02            | 1.37E+03                        |
| CELLINA 3 M    | GALATONE | 27.59    | 0.00472               | 0.33032 | 0.41290                       | 2.07E+03            |                                 |
| CELLINA 4 B    | GALATONE | 25.63    | 0.01574               | 1.10    | 1.37                          | 6.90E+03            | 5.39E+03                        |
| CELLINA 4 M    | GALATONE | 26.17    | 0.01131               | 0.79194 | 0.98993                       | 4.96E+03            |                                 |
| CELLINA 5 B    | GALATONE | 31.45    | 0.00621               | 0.43439 | 0.54299                       | 2.72E+03            | 5.91E+03                        |
| CELLINA 5 M    | GALATONE | 25.18    | 0.02077               | 1.45    | 1.81                          | 9.11E+03            |                                 |
| CELLINA 6 B    | GALATONE | 26.82    | 0.00763               | 0.53399 | 0.66749                       | 3.35E+03            | 1.71E+03                        |
| CELLINA 6 M    | GALATONE | 32.90    | 0.00018               | 0.01252 | 0.01565                       | 7.85E+01            |                                 |
| CELLINA7 B     | GALATONE | 26.55    | 0.00895               | 0.62680 | 0.78350                       | 3.93E+03            | 2.29E+02                        |
| CELLINA 7 M    | GALATONE | 29.44    | 0.00151               | 0.10562 | 0.13203                       | 6.62E+02            |                                 |
| LECCINO 1 B    | GALATONE | 26.38    | 0.00996               | 0.69702 | 0.87128                       | 4.37E+03            | 2.19E+03 * <sup>6</sup>         |
| LECCINO 2 B    | GALATONE | 0.00     | 0.00                  | 0.00    | 0.00                          | 0.00E+00            | 0.00E+00 * <sup>7</sup>         |
| LECCINO 3 B    | GALATONE | 29.58    | 0.00139               | 0.09698 | 0.12122                       | 6.08E+02            | 3.04E+02 * <sup>8</sup>         |
| LECCINO 4 B    | GALATONE | 0.00     | 0.00                  | 0.00    | 0.00                          | 0.00E+00            | 0.00E+00 * <sup>9</sup>         |
| LECCINO 5 B    | GALATONE | 0.00     | 0.00                  | 0.00    | 0.00                          | 0.00E+00            | 1.18E+00 * <sup>10</sup>        |
| LECCINO 6 B    | GALATONE | 27.45    | 0.00516               | 0.36134 | 0.45168                       | 2.26E+03            | 1.13E+03 * <sup>11</sup>        |

E=90%;  $r^2=0.996$ ; Slope=-3.589

\*<sup>1</sup> Mean with Ogliarola salentina 6B Cannole

\*<sup>2</sup> Mean with Ogliarola salentina 7B Cannole

\*<sup>3</sup> Mean with Ogliarola salentina 8B Cannole

\*<sup>4</sup> Mean with Ogliarola salentina 9B Cannole

\*<sup>5</sup> Mean with Ogliarola salentina 10B Cannole

\*<sup>6</sup> Mean with Leccino 1M Cannole

\*<sup>7</sup> Mean with Leccino 2M Cannole

\*<sup>8</sup> Mean with Leccino 3M Cannole

\*<sup>9</sup> Mean with Leccino 4M Cannole

\*<sup>10</sup> Mean with Leccino 5M Cannole

\*<sup>11</sup> Mean with Leccino 6M Cannole

| Cultivar      | Plot     | CT ratio | ng $\mu\text{L}^{-1}$ | ng TOT  | ng Tot $\text{g}^{-1}$ sample | CFU $\text{g}^{-1}$ | CFU value $\text{g}^{-1}$ plant |
|---------------|----------|----------|-----------------------|---------|-------------------------------|---------------------|---------------------------------|
| LECCINO 1 M   | GALATONE | 33.70    | 0.00002               | 0.00138 | 0.00172                       | 8.63E+00            | 2.19E+03 * <sup>6</sup>         |
| LECCINO 2 M   | GALATONE | 0.00     | 0.00                  | 0.00    | 0.00                          | 0.00E+00            | 0.00E+00 * <sup>7</sup>         |
| LECCINO 3 M   | GALATONE | 0.00     | 0.00                  | 0.00    | 0.00                          | 0.00E+00            | 3.04E+02 * <sup>8</sup>         |
| LECCINO 4 M   | GALATONE | 0.00     | 0.00                  | 0.00    | 0.00                          | 0.00E+00            | 0.00E+00 * <sup>9</sup>         |
| LECCINO 5 M   | GALATONE | 35.29    | 0.00001               | 0.00038 | 0.00047                       | 2.37E+00            | 1.18E+00 * <sup>10</sup>        |
| LECCINO 6 M   | GALATONE | 0.00     | 0.00                  | 0.00    | 0.00                          | 0.00E+00            | 1.13E+03 * <sup>11</sup>        |
| LECCINO 7 B   | GALATONE | 28.76    | 0.00061               | 0.04277 | 0.05346                       | 2.68E+02            | 2.75E+02                        |
| LECCINO7 M    | GALATONE | 33.83    | 0.00002               | 0.00110 | 0.00137                       | 6.89E+00            |                                 |
| OGLIAROLA 1 B | GALATONE | 25.07    | 0.00842               | 0.58957 | 0.73697                       | 3.69E+03            | 2.06E+03                        |
| OGLIAROLA 1 M | GALATONE | 28.10    | 0.00095               | 0.06665 | 0.08332                       | 4.18E+02            |                                 |
| OGLIAROLA 2 B | GALATONE | 26.48    | 0.00307               | 0.21463 | 0.26829                       | 1.34E+03            | 4.11E+03                        |
| OGLIAROLA 2 M | GALATONE | 24.20    | 0.01570               | 1.09    | 1.37                          | 6.88E+03            |                                 |
| OGLIAROLA 3 B | GALATONE | 32.91    | 0.00003               | 0.00236 | 0.00295                       | 1.48E+01            | 5.04E+01                        |
| OGLIAROLA 3 M | GALATONE | 30.29    | 0.00020               | 0.01374 | 0.01718                       | 8.61E+01            |                                 |
| OGLIAROLA 4 B | GALATONE | 23.92    | 0.01931               | 1.35    | 1.68                          | 8.47E+03            | 6.89E+03                        |
| OGLIAROLA 4 M | GALATONE | 24.58    | 0.01213               | 0.84910 | 1.06                          | 5.32E+03            |                                 |
| OGLIAROLA 5 B | GALATONE | 23.43    | 0.02737               | 1.91    | 2.39                          | 1.20E+04            | 6.84E+03                        |
| OGLIAROLA 5 M | GALATONE | 26.17    | 0.00381               | 0.26655 | 0.33318                       | 1.67E+03            |                                 |
| OGLIAROLA 6 B | GALATONE | 28.29    | 0.00083               | 0.05825 | 0.07281                       | 3.65E+02            | 3.31E+02                        |
| OGLIAROLA 6 M | GALATONE | 28.58    | 0.00068               | 0.04726 | 0.05908                       | 2.96E+02            |                                 |
| OGLIAROLA 7 B | GALATONE | 30.71    | 0.00019               | 0.01348 | 0.01685                       | 8.45E+01            | 2.25E+03                        |
| OGLIAROLA 7 M | GALATONE | 24.82    | 0.01007               | 0.70514 | 0.88142                       | 4.42E+03            |                                 |

E=105%;  $r^2=0.995$ ; Slope=-3.201

\*<sup>6</sup> Mean with Leccino 1B Cannole

\*<sup>7</sup> Mean with Leccino 2B Cannole

\*<sup>8</sup> Mean with Leccino 3B Cannole

\*<sup>9</sup> Mean with Leccino 4B Cannole

\*<sup>10</sup> Mean with Leccino 5B Cannole

\*<sup>11</sup> Mean with Leccino 6B Cannole
